# Supplementary material for: The ECMWF operational ensemble reanalysis-analysis system for ocean and sea-ice: a description of the system and assessment
Source: Copernicus journal article supplement (doi:10.5194/os-2018-154), 2019-01-08
Supplement: Supplementary file [file os-2018-154-AC1-supplement.pdf]

## Anonymous Referee #1

Received and published: 11 Feb 2019

### General comments

*This paper documents the main developments that led to the production of the ORAS5/OCEAN5 global ocean reanalysis/analysis system and provides an assessment of this product concerning main key climate parameters. A lot of work has been done to reach this point. The paper is well-written, and being ORAS5 a state-of-the-art ocean reanalysis system that will likely be widely used, I recommend publication of the manuscript after a few, mostly formal, issues are addressed by the authors. The paper will be of great interest for both reanalysis developers and users.*

We would like to thank the reviewer for his/her useful comments. Please see our responses to all specific comments below

### General comments

*1) I found the organization of Section 4 a bit misleading: i) section 4.1 cannot be really considered part of assessment, it concerns OSEs performed with a low-resolution configuration, without bias correction nor altimetry assimilation and for a limited period. I don't think it is really relevant for assessing the high-resolution ORAS5 system. I suggest moving it in an Appendix and summarizing the main outcomes in Section 2.3.1 rather than 4. ii) Sensitivity tests (section 4.2 4.3) could be presented in section 4, and start a new Section 5 about the Assessment strictly speaking. iii) Sea/ice section (4.4.3) can benefit of having a comparison symmetrical to 4.4.1 and 4.4.2, namely showing ORAS5 vs ORAS4 and control runs, rather than ORAP5. I think homogenizing the assessment improves its clarity.*

We would like to thank the reviewer for these comments. We have made the following changes in Section 4 to accommodate the reviewer suggestions:

i) We agree that OSE results in Section 4.1 are not closely related with ORAS5 assessment. They have been carried out in a low-resolution configuration and slightly different setups compared to ORAS5. Nevertheless, these OSEs results provide useful information on regional characteristics of impact from assimilating different in-situ observation types, which is useful to understand the behaviour of ORAS5 This is also recognized by the other reviewer, who has a contrasting view. Therefore, we would like to keep the OSE results, but in the review manuscript we present them as part of Section 2 (new Section 2.3.2). Section 2 deals with the technical sensitivities of the ECMWF ocean data assimilation system. The current Section 4.1 has been removed as recommended by the reviewer.

ii) We have followed the reviewer's suggestion. Now the old Sections 4.2 and 4.3 become new Section 4.1 and 4.2. The old Section 4.4 become new Section 5 with three subsections.

iii) We totally agree that it would help to have homogenized assessment plots among three ECVs variables in Section 4.4.1, 4.4.2 and 4.4.3. However, ORAS4 does not have a sea-ice model, nor does it include any sea-ice assimilation. Instead, sea-ice conditions in ORAS4 are prescribed using an external and heterogeneous sea-ice dataset. Therefore, we chose to compare ORAS5 with ORAP5, the first pilot ECMWF ocean and sea-ice reanalysis product.

*2) In many parts of the manuscript, ESA CCI data are considered independent verifying data. I don't really agree with that, since all sensors used by ESA CCI (infrared AVHRR, PMW, altimetry radars) are also at the base of the observational datasets assimilated by ORAS5. This is clearly testified by Figure 4 (for SST) and Figure 22a (for SLA). Suggest dropping the mention to*

*“independent” and consider these datasets as “reference climate data” or similar. P1L12, P29L4, P32L9, P37L32 etc.*

We would like to thank the reviewer for this important comment. We agree that ESA CCI data is not completely independent considering that most sensors and satellite platforms are the same when producing ESA CCI data and when producing the other observational data sets that were assimilated in ORAS5. However, their production system (e.g. slightly different satellite missions) and processing chain (e.g. bias correction method, altimeter standard etc) are independent. After all, satellite only measures radiation, and there is large uncertainties when retrieving sea surface variables (e.g. SST) from this radiation. We have tried to clarify this point in a few places. e.g. in P28 L28-L30, P29 L2-L5, P32 L5-L10 etc.

To further clarify this point, we agree that the phrase “independent data set” may not be suitable, and we have replaced it by “reference climate data” as suggested by the reviewer everywhere in the manuscript. P28 L28-L30 have been rewritten as well.

*“Here, the latest versions of these ESA CCI climate data records for SST, SLA and SIC were chosen as reference climate data sets to verify ORAS5 and some relevant sensitivity experiments. These observation-only analyses are produced with different production systems (e.g. different satellite missions) and/or processing chains (e.g. bias correction method) compared to the observational data sets that were assimilated in ORAS5. ”*

*3) The developments in Section 2 are often corroborated with tests, each of them performed with different configurations, sometimes even different resolution than the nominal ORAS5. Suggest introducing Section 2 by mentioning that there exists no warranty that the “sum” of improvements leads to the “best configuration”, but obviously this is the standard and only possible procedure (or similar concept).*

We would like to thank the review for this very useful comment. We have added the following texts at the beginning of Section 2 to highlight this point.

*“... This includes different observation data sets of SST, SIC, and in-situ observations; updates in bias estimation and observation quality controls; and a new method in ensemble generation and initialization. Impacts of these updates have been assessed with data assimilation experiments, normally in a reduced resolution in order to reduce computing cost. It is worth pointing out that improvements from these updates presented in this section may not add up to an accumulative “sum” of improvements in ORAS5, and an optimized best configuration is not always guaranteed if it is based on results from a low resolution system. However, this is the standard and only possible procedure to test many components in a complex system such as ORAS5.”*

### *Specific Comments*

#### *Abstract:*

*L7 (and in P3L7 and Table 1): “1979 onwards, extended to 1958”: for a reader it is not so easy to understand why you don't just say “from 1958 onwards”. If you consider 1958-1978 part of the initialization/spinup strategy, perhaps the backward extension should be drop, or just consider one entire timeseries? Otherwise seems there are two independent streams of production. Better to rephrase and clarify.*

Thank you for this comment.

The “backward extension” of ORAS5 between 1958-1978 refers to one of the ORAS5 spin-up run (INI1 in Table 2) which provides initial conditions for the control member of ORAS5. Whether this should be considered as spin up or back-extension depends more on the application. It can certainly be used to initialize decadal or seasonal forecasts, or to gain insight into the evolution of climate signals. However, it is not part of the operational ORAS5. It has been provided in case users are interested in longer reanalysis period. In the revised manuscript and we have tried to make this more clear by introducing the following changes

1. Abstract L7: text “backward extension to 1958” has been removed.
2. P3L7: added following text at the beginning of Section 2 for clarification  
*“...ORAS5 provides historical ocean and sea-ice conditions from 1979 onwards. And a spin-up period between 1958 to 1978 is also provided (INI1 in Table. 2)}, which can be treated as a backward extension by users that are interested in a longer reanalysis period.”*
3. Table 1: replace “+backward extension to 1958” by “+a spin-up from 1958-1978”.

*L10: “analysis error” never really considered, strictly speaking? Perhaps better to say “reanalysis-observation mismatch” or similar Intro*

Agree, “analysis error” has been removed. And L9-10 rewritten to  
*“Assessment of ORAS5 system components through sensitivity experiments suggests that assimilation of observations contribute to an improved fit to observation in reanalyses, ...”*

*P2L23: maybe not important the funding (this should go in the Acknowledg.), but that ORAS5 is part of the C3S service and envelop of products. Is it not also part of CMEMS?*

Thank you. Funding support from C3S for ORAS5 production has already been included in the Acknowledgement, so we removed this sentence from Introduction. ORAS5 is not yet included in C3S service/product. ORAS5 data is distributed through CMEMS.

## *Section 2*

*P3L26: I guess “observation equivalent background fields” otherwise sounds weird*

Thank you, now corrected to “... observations and model background state are passed to ...”

*Table 2: suggest adding the “year of initialization”, explaining in the caption the “capping” and describe qualitatively the meaning of “latitudinal decay”, is it the bias-correction correlation length scales, in units of degrees, latitudinal bands?*

Thank you for this useful comment.

1. Title for the second column changed to “Year of initialization”
2. We have replaced “Sali. Capping” by “Bias capping” in Table 2, and added following text in Table 2 to clarify this term.  
*“Bias capping is a switch to cap the minimum value of salinity bias correction term to prevent static instability, see Section.2.3.3.”*
3. We have rewritten the caption of Table as below for clarification.  
*“ $\phi_c$  is a constant value of latitudinal bands (in degrees), which is used to define a reduction coefficient for the pressure gradient component of bias correction, see Eq.~6 and 7 in Zuo et al., (2015).”*

*Figure 2: Not sure whether the 1975-1988 cooling is realistic or an artifact of the initialization, and likewise the following warming (amplified by the previous cooling?). Perhaps discussing the cooling/warming, also in terms of W/m<sup>2</sup>, could help the readership to see if this globally integrated signal is trustful, or only upper ocean is trustful?*

Thank you for this comment.

The cooling between 1975-1982 is present in all 5 ensemble members of ORAS5. A similar cooling trend in the upper 2000m OHC is also visible in Cheng et al., (2017), which is derived from observation data only with improved method to account for sampling error. However, it is possible that this cooling trend in ORAS5 was amplified due to its initialization method. Anyhow, Figure 2 is mainly for demonstrating the ORAS5 initialization strategy. And we have chosen not to discuss any climate signal derived from ORAS5 in this manuscript, since these contents will be discussed in a different paper we are preparing at the moment. This approach (no discussion of climate signals) has been emphasized in the introduction part of the manuscript.

*P7L2 You mean “SST, SSS observations” I guess, if so better to specify.*

Thanks and corrected.

*P8L2 converting in days the SSS restoring term, as for SST, could help*

Thank you. We have added the following text for SSS relaxation.

*“The SSS relaxation term is -33.3 mm/day. This is equivalent to a restoration time-scale of about 1 year for a well-mixed upper 10 m layer of water with a mean model surface salinity of 35 psu.”*

*P8L24: Sure ESA SST CCI doesn't use drifters/buoys for calibration?*

That's correct. ESA CCI SST does not bias correct against drifters/buoys data.

*Section 2.2 and 3: For climate monitoring applications, it will be very beneficial if from time to time (e.g. once per year) the system is rewind and delayed time data are used instead of real-time data as from 2015 on (EN4 and ERA-Interim instead of GTS and NWP). This will produce time-consistent time series not only till 2015. Are the authors considering this? Do they consider the reanalysis strictly speaking ending in 2015? Maybe you could add a sentence about that Table 3: worth to say if there have (not) been issues with the different sea-ice mask in OSTIA and HadISST2 used for SIC and SST relaxation, respectively*

We would like to thank the reviewer for this very useful comment.

Re-run of ORAS5 using ERA-Interim forcing and reprocessed observation like EN4 has just been finished for the 2015-2017 period. This re-processed ORAS5 data will be distributed by CMEMS in the future. The plan is to extend this product from 2018 onwards using consistent forcing and observation data set (re-processed ORAS5), with a delay no more than 1 year to Real-Time. We have added this information in Section 2.2 as below

*“Readers, however, should note that ORAS5 will be re-processed with ERA-Interim forcing and reprocessed observation data set (e.g. EN4) from 2015 onwards. This re-processed ORAS5 product will be extended annually with consistent forcing and observation data set whenever possible. This should produce consistent time series that are suitable for climate monitoring applications beyond 2014. The reprocessed ORAS5 will be available as part of the ensemble of global reanalyses distributed by the Copernicus Marine Environmental Monitoring Services (CMEMS)”*

We did not notice any sea-ice mask issue when applying SST/SIC relaxation to OSTIA or HadISST2 observations. Therefore we prefer not to add more context in Table 3.

*P11L4 worth to add which EN4 data quality flags are used to ingest data, ie all available or only very good quality data?*

Thank you. We have added following sentence

*“The same quality control procedures as described in Section 2.3.3 are applied to all GTS data, to ensure that only good quality observations similar to EN4 data are assimilated in ORAS5”*

*Figure 8. Different sign of bias (ORA4 vs ORA5) could suggest bias coming mostly from vertical physics rather than forcing, which is the same among the two reanalyses? If the authors have any speculation could be worth adding it.*

Following sentence has been added

*“Considering that all three reanalyses use the same ERA-Interim forcing, the different sign of bias terms is likely a result of model physics/resolution rather than forcing. However, both the SST observational data set and the surface flux formulation have changed substantially between ORAS4 and ORAS5, and therefore, the effect of surface fluxes and SST cannot be neglected.”*

*P17L6 Is a typo and should be 1993-2012, or is there a reason to start from 1996 instead of 1993 (I guess it doesn't really matter though)*

This is not a typo. The ORAS5 MDT is estimated over a reference period between 1996-2012, slightly shorter than used for the estimation of DT2014 MDT (1993-2012). This was done in order to accelerate the estimation process. An additional correction term accounts for the different averaging periods. This approach ensures that the estimated MDT is less susceptible to the choice of averaging period. The approach is not new. It was first introduced in ORAP5 to cope with the different reference period used by the altimeter-derived sea level anomalies.

*P28L18 “This is expected...” This sentence seems to implicitly underline that the majority of RMSE comes from bias<sup>2</sup> and not (standard deviation of innovations)<sup>2</sup>, although the authors do not quantify it (just RMSE shown). Since it is probably not the case, it seems to me an over statement. If so, probably better to drop it, unless I miss something.*

Thank you for this comment. For the sake of brevity, we chose not to show the mean biases in Figure 16 and 17. Partition of total RMSE to the mean bias and temporal variance varies between different regions, so not easy to conclude which part comprises the majority of RMSE. Therefore, we have rephrased this sentence as below.

*“One possible reason for this relatively small impact from assimilation of altimeter data is that, by construction, the assimilation of SLA does not correct mean model biases but only affects the temporal variability of reanalysis. In addition, the altimeter data in the ECMWF reanalyses is perhaps given a “weak weight” compared with meso-scale applications of ocean data assimilation, as to avoid spurious circulations and degradation of the deep ocean (Zuo et al 2015).”*

*Section 4.4.1. Comparing Figure 19c with 20a, it seems the main differences of ORAS5 vs ESA CCI comes from the SST dataset ingested for the largest period (HadISST). Perhaps would be worth discussing in more details this aspect, or even showing ORAS5 minus HadISST?*

It is true that most SST bias as ORAS5 – ESA\_CCI comes from HadISSTv2 SST, which has been used to constrain ORAS5 SST between 1979-2007. However, there are areas with large biases, e.g. along the Gulf Stream, which are mostly due to model/forcing errors. We have added some discussion in this section as below. However, we prefer not to add more figure in the manuscript considering that there are already more than 20 figures.

*“...Spatial patterns of SST bias and RMSE in ORAS5 (Fig. 18c,d) are consistent with those derived from the difference of HadISST2 and SST\_cci1.1 (Fig. 20a,b), with large RMSE normally in regions with strong eddy kinetic energy (EKE)...”*

*P32L25 this also seems an over statement to me: if the column-integrated density variability is well reproduced in those areas, it doesn't mean they have the smallest errors in general*

We would like to thank the review for this comment. It is true that a well-reproduced temporal variation of SSH is not necessarily equivalent to a least-biased mean ocean state, Vertical distribution of compensating bias patterns in temperature and salinity could still exist. However, further evidence presented in the section with the OSEs results also suggest that our ocean synthesis is least affected by data assimilation in the Tropical Pacific and Indian, despite plenty of in-situ observations being available in these regions. Therefore, we believe this conclusion should stand.

*P34L7 Would you speculate that it's because 1/4 degree resolution is still not high enough in the extra-tropics?*

One important reason that ORAS5 still underestimated SLA variance by ~25% is because the SLA observations have been thinned to a reduced grid of approximately 1x1 degree. This is a choice made in ORAS4 considering the observation representativeness errors. However, this should be revised for the eddy-permitting ORAS5 system. This thinning scheme means that we only assimilate approximately 15% of the total SLA observations. However, it remains an open question whether the assimilation should compensate of a deficiency that has its origin in the forward ocean model. The CNTRL experiment clearly exhibits this underestimation, and it is likely related with the ¼ of degree resolution still being insufficient. We have made this point in the text.

We have added the following sentence to clarify this point.

*“One important reason for this underestimation is that ORAS5 still uses a 1 degree reduced grid when applying thinning for SLA observations, which may be sub-optimal considering ORAS5 comprises a 0.25 degree resolution ocean model. However, it remains an open question whether the assimilation should compensate for a deficiency that has its origin in the forward ocean model. The CTL-HadIS experiment clearly exhibits this underestimation, and it is likely related to the 0.25 degree resolution still being insufficient.”*

*Fig 24 maybe the same color palette as Fig 23 helps comparing the two figures.*

Thank you. We have updated the Fig 24 with the same color scale as in Fig 23.

*P37L20: is not “atmospheric analysis” and “NWP forcing” exactly the same?*

Not exactly. Atmospheric analysis is output with data assimilation, while “NWP forcing” also includes short-term forecasts. However, this description is a bit repetitive, and hence we have removed “atmospheric analysis” in this sentence.

*P38L27: Not sure an observed MDT (SSH and geoid) will be the best for reanalyses, because as the*

*authors showed many times in past works it would lead to unrealistic and abrupt drifts in ~ 1993. Anyway, just a personal comment. Could be useful in the conclusions to summarize some future directions of the ORAS as already mentioned in the text (ERA5? Stochastic physics? Retuning of BECs?).*

Thank you for this comment. In the conclusion, we have already included some discussions about our plans for ORAS development, in particular regarding SST and SLA assimilations. Anyhow, we have added a bit more discussion in the conclusion as below.

*“Development of the next generation of ocean reanalysis system also requires: a) a better quality atmospheric forcing with increased temporal and spatial resolutions; b) an improved perturbation strategy with stochastic model perturbations; c) a flow-dependent BGE covariance matrix in NEMOVAR; and d) revised parameterizations for both OBE and BGE covariance matrices.”*

*Typos*

*P1L11 system experimentS*

Corrected.

*P1L12 carried out FOR*

Corrected

*P1L16 which ARE possibly*

Corrected

*P2L1 improvementS*

Corrected

*P3L11 BARNIER (and not Bernard)*

Corrected

*P3L15 visco-plastic?*

viscous-plastic should be correct.

*P8L5: remove brackets from “(Titchner...” reference*

Corrected.

*P8L10 comes FROM HadISST2.1*

Corrected.

*P11L15 subject*

Corrected.

*P12L17 due to the assimilation of an evolving....*

Corrected.

*P21L15 “deliver on...” not sure makes sense, better to rephrase*

Thank you. Now rephrased to “... the OCEAN5 system is a major component needed for ECMWF's Earth system approach ...”

*P37L8 ORAS5 IS a ...*

Corrected

*P37L25 This result suggestS*  
Corrected.
